# Supplementary material for: Coevolution Analysis of HIV-1 Envelope Glycoprotein Complex
Source: PubMed Central journal article supplement (PMC4651434; doi:10.1371/journal.pone.0143245), 2015-11-18
Supplement: pone.0143245.s002.pdf [file pone.0143245.s002.pdf]

Supplementary information for:  
Coevolution Analysis of HIV-1 Envelope Glycoprotein Complex

Reda Rawi<sup>1,\*</sup>, Khalid Kunji<sup>1</sup>, Abdelali Haoudi<sup>2,3</sup>, Halima Bensmail<sup>1</sup>

**1 Computational Sciences and Engineering Center, Qatar Computing Research  
Institute, Doha, Qatar**

**2 Division of Genetics and Genomics, Boston Children’s Hospital, Harvard  
Medical School, Boston, MA, USA**

**3 King Abdullah International Medical Research Center, King Abdulaziz  
Medical City, Riyadh, Saudi Arabia**

\* Corresponding author  
E-mail: rrawi@qf.org.qa (RR)

**Table S1: Coevolving residue pairs in HIV-1 Env.**

|    | <b>i (HXB2)</b> | <b>i (Domain)</b> | <b>j (HXB2)</b> | <b>j (Domain)</b> | <b>GREMLIN</b> | <b>TP</b> |
|----|-----------------|-------------------|-----------------|-------------------|----------------|-----------|
| 1  | 398             | V4                | 400             | V4                | 1.19           | 1         |
| 2  | 411             | V4                | 413             | V4                | 1.15           | 1         |
| 3  | 474             | C5                | 476             | C5                | 1.14           | 1         |
| 4  | 289             | C2                | 291             | C2                | 1.11           | 1         |
| 5  | 230             | C2                | 232             | C2                | 1.08           | 1         |
| 6  | 135             | V1                | 137             | V1                | 1.06           | 1         |
| 7  | 396             | V4                | 398             | V4                | 1.02           | 1         |
| 8  | 332             | C3                | 334             | C3                | 0.98           | 1         |
| 9  | 137             | V1                | 139             | V1                | 0.97           | 1         |
| 10 | 402             | V4                | 404             | V4                | 0.96           |           |
| 11 | 362             | C3                | 363             | C3                | 0.93           | 1         |
| 12 | 356             | C3                | 357             | C3                | 0.85           | 1         |
| 13 | 461             | V5                | 463             | V5                | 0.80           | 1         |
| 14 | 283             | C2                | 453             | C4                | 0.80           | 1         |
| 15 | 295             | C2                | 297             | V3                | 0.78           | 1         |
| 16 | 620             | Ectodomain        | 624             | Ectodomain        | 0.73           |           |
| 17 | 502             | C5                | 607             | Ectodomain        | 0.72           |           |
| 18 | 465             | V5                | 467             | V5                | 0.70           | 1         |
| 19 | 777             | Endodomain        | 778             | Endodomain        | 0.69           |           |
| 20 | 293             | C2                | 337             | C3                | 0.67           | 1         |
| 21 | 187             | V2                | 189             | V2                | 0.66           |           |
| 22 | 145             | V1                | 147             | V1                | 0.66           |           |
| 23 | 632             | Ectodomain        | 636             | Ectodomain        | 0.65           |           |
| 24 | 279             | C2                | 281             | C2                | 0.65           | 1         |
| 25 | 356             | C3                | 358             | C3                | 0.64           | 1         |
| 26 | 398             | V4                | 399             | V4                | 0.64           | 1         |
| 27 | 446             | C4                | 448             | C4                | 0.63           | 1         |
| 28 | 136             | V1                | 138             | V1                | 0.63           | 1         |
| 29 | 234             | C2                | 236             | C2                | 0.62           | 1         |
| 30 | 334             | C3                | 336             | C3                | 0.61           | 1         |
| 31 | 138             | V1                | 140             | V1                | 0.61           | 1         |

Continued on next page

Table S1 – continued from previous page

|    | i (HXB2) | i (Domain) | j (HXB2) | j (Domain) | GREMLIN | TP |
|----|----------|------------|----------|------------|---------|----|
| 32 | 140      | V1         | 142      | V1         | 0.60    |    |
| 33 | 410      | V4         | 412      | V4         | 0.60    | 1  |
| 34 | 360      | C3         | 465      | V5         | 0.60    | 1  |
| 35 | 397      | V4         | 399      | V4         | 0.59    | 1  |
| 36 | 30       | SP         | 32       | SP         | 0.59    |    |
| 37 | 139      | V1         | 141      | V1         | 0.58    |    |
| 38 | 13       | SP         | 20       | SP         | 0.58    |    |
| 39 | 397      | V4         | 398      | V4         | 0.58    | 1  |
| 40 | 337      | C3         | 339      | C3         | 0.57    | 1  |
| 41 | 399      | V4         | 400      | V4         | 0.57    | 1  |
| 42 | 400      | V4         | 402      | V4         | 0.56    |    |
| 43 | 362      | C3         | 364      | C3         | 0.56    | 1  |
| 44 | 290      | C2         | 340      | C3         | 0.55    | 1  |
| 45 | 97       | C1         | 275      | C2         | 0.55    | 1  |
| 46 | 144      | V1         | 146      | V1         | 0.55    |    |
| 47 | 321      | V3         | 322      | V3         | 0.55    | 1  |
| 48 | 231      | C2         | 268      | C2         | 0.55    | 1  |
| 49 | 747      | Endodomain | 758      | Endodomain | 0.54    |    |
| 50 | 188      | V2         | 190      | V2         | 0.54    | 1  |
| 51 | 134      | V1         | 136      | V1         | 0.54    | 1  |
| 52 | 399      | V4         | 401      | V4         | 0.54    |    |
| 53 | 133      | V1         | 135      | V1         | 0.53    | 1  |
| 54 | 138      | V1         | 139      | V1         | 0.53    | 1  |
| 55 | 170      | V2         | 172      | V2         | 0.53    | 1  |
| 56 | 400      | V4         | 401      | V4         | 0.53    |    |
| 57 | 393      | V4         | 395      | V4         | 0.53    | 1  |
| 58 | 348      | C3         | 351      | C3         | 0.52    | 1  |
| 59 | 403      | V4         | 404      | V4         | 0.51    | 1  |
| 60 | 139      | V1         | 140      | V1         | 0.51    | 1  |
| 61 | 275      | C2         | 279      | C2         | 0.51    | 1  |
| 62 | 306      | V3         | 308      | V3         | 0.51    | 1  |
| 63 | 147      | V1         | 149      | V1         | 0.50    |    |
| 64 | 187      | V2         | 188      | V2         | 0.50    |    |
| 65 | 137      | V1         | 138      | V1         | 0.50    | 1  |
| 66 | 85       | C1         | 229      | C2         | 0.50    | 1  |
| 67 | 275      | C2         | 278      | C2         | 0.50    | 0  |
| 68 | 401      | V4         | 403      | V4         | 0.49    |    |
| 69 | 231      | C2         | 267      | C2         | 0.49    | 1  |
| 70 | 519      | FP         | 520      | FP         | 0.48    |    |
| 71 | 290      | C2         | 337      | C3         | 0.48    | 1  |
| 72 | 774      | Endodomain | 775      | Endodomain | 0.48    |    |
| 73 | 401      | V4         | 402      | V4         | 0.48    |    |
| 74 | 229      | C2         | 230      | C2         | 0.46    | 1  |
| 75 | 412      | V4         | 413      | V4         | 0.46    | 1  |
| 76 | 85       | C1         | 87       | C1         | 0.46    | 1  |
| 77 | 411      | V4         | 412      | V4         | 0.46    | 1  |
| 78 | 219      | C2         | 225      | C2         | 0.45    | 1  |
| 79 | 325      | V3         | 419      | C4         | 0.45    | 1  |
| 80 | 293      | C2         | 295      | C2         | 0.45    | 1  |
| 81 | 134      | V1         | 135      | V1         | 0.45    | 1  |
| 82 | 778      | Endodomain | 779      | Endodomain | 0.45    |    |

Continued on next page

Table S1 – continued from previous page

|     | i (HXB2) | i (Domain) | j (HXB2) | j (Domain) | GREMLIN | TP |
|-----|----------|------------|----------|------------|---------|----|
| 83  | 513      | FP         | 514      | FP         | 0.45    |    |
| 84  | 135      | V1         | 136      | V1         | 0.45    | 1  |
| 85  | 136      | V1         | 137      | V1         | 0.44    | 1  |
| 86  | 65       | C1         | 208      | C2         | 0.44    | 1  |
| 87  | 152      | V1         | 154      | V1         | 0.44    | 1  |
| 88  | 618      | Ectodomain | 620      | Ectodomain | 0.43    |    |
| 89  | 755      | Endodomain | 758      | Endodomain | 0.43    |    |
| 90  | 330      | V3         | 334      | C3         | 0.43    | 0  |
| 91  | 413      | V4         | 415      | V4         | 0.43    | 1  |
| 92  | 232      | C2         | 268      | C2         | 0.43    | 1  |
| 93  | 658      | Ectodomain | 662      | Ectodomain | 0.43    |    |
| 94  | 360      | C3         | 362      | C3         | 0.42    | 1  |
| 95  | 290      | C2         | 344      | C3         | 0.42    | 1  |
| 96  | 402      | V4         | 403      | V4         | 0.42    |    |
| 97  | 149      | V1         | 151      | V1         | 0.42    | 1  |
| 98  | 4        | SP         | 7        | SP         | 0.42    |    |
| 99  | 394      | V4         | 396      | V4         | 0.42    | 1  |
| 100 | 410      | V4         | 411      | V4         | 0.42    | 1  |
| 101 | 659      | Ectodomain | 662      | Ectodomain | 0.41    |    |
| 102 | 462      | V5         | 463      | V5         | 0.41    | 1  |
| 103 | 360      | C3         | 467      | V5         | 0.41    | 1  |
| 104 | 22       | SP         | 23       | SP         | 0.41    |    |
| 105 | 769      | Endodomain | 770      | Endodomain | 0.41    |    |
| 106 | 153      | V1         | 154      | V1         | 0.41    | 1  |
| 107 | 330      | V3         | 332      | C3         | 0.41    | 1  |
| 108 | 230      | C2         | 240      | C2         | 0.40    | 1  |
| 109 | 335      | C3         | 412      | V4         | 0.40    | 1  |
| 110 | 277      | C2         | 352      | C3         | 0.40    | 1  |
| 111 | 293      | C2         | 446      | C4         | 0.40    | 1  |
| 112 | 389      | V4         | 417      | V4         | 0.40    | 1  |
| 113 | 354      | C3         | 357      | C3         | 0.40    | 1  |
| 114 | 640      | Ectodomain | 641      | Ectodomain | 0.40    |    |
| 115 | 92       | C1         | 238      | C2         | 0.39    | 1  |
| 116 | 655      | Ectodomain | 658      | Ectodomain | 0.39    |    |
| 117 | 674      | Ectodomain | 677      | Ectodomain | 0.39    |    |
| 118 | 641      | Ectodomain | 644      | Ectodomain | 0.39    |    |
| 119 | 460      | C4         | 462      | V5         | 0.39    | 1  |
| 120 | 150      | V1         | 152      | V1         | 0.39    | 1  |
| 121 | 398      | V4         | 401      | V4         | 0.39    |    |
| 122 | 187      | V2         | 190      | V2         | 0.39    |    |
| 123 | 396      | V4         | 397      | V4         | 0.39    | 1  |
| 124 | 358      | C3         | 360      | C3         | 0.39    | 1  |
| 125 | 149      | V1         | 150      | V1         | 0.39    | 1  |
| 126 | 464      | V5         | 465      | V5         | 0.39    | 1  |
| 127 | 320      | V3         | 321      | V3         | 0.38    | 1  |
| 128 | 148      | V1         | 150      | V1         | 0.38    |    |
| 129 | 300      | V3         | 442      | C4         | 0.38    | 1  |
| 130 | 289      | C2         | 344      | C3         | 0.38    | 1  |
| 131 | 815      | Endodomain | 818      | Endodomain | 0.38    |    |
| 132 | 130      | C1         | 132      | V1         | 0.38    | 1  |
| 133 | 396      | V4         | 400      | V4         | 0.38    | 0  |

Continued on next page

Table S1 – continued from previous page

|     | <b>i (HXB2)</b> | <b>i (Domain)</b> | <b>j (HXB2)</b> | <b>j (Domain)</b> | <b>GREMLIN</b> | <b>TP</b> |
|-----|-----------------|-------------------|-----------------|-------------------|----------------|-----------|
| 134 | 817             | Endodomain        | 818             | Endodomain        | 0.37           |           |
| 135 | 700             | TM                | 758             | Endodomain        | 0.37           |           |
| 136 | 442             | C4                | 444             | C4                | 0.37           | 1         |
| 137 | 32              | SP                | 33              | C1                | 0.37           | 1         |
| 138 | 357             | C3                | 358             | C3                | 0.37           | 1         |
| 139 | 339             | C3                | 341             | C3                | 0.37           | 1         |
| 140 | 273             | C2                | 481             | C5                | 0.37           | 1         |
| 141 | 192             | V2                | 426             | C4                | 0.37           | 0         |
| 142 | 401             | V4                | 404             | V4                | 0.37           |           |
| 143 | 746             | Endodomain        | 758             | Endodomain        | 0.36           |           |
| 144 | 724             | Endodomain        | 726             | Endodomain        | 0.36           |           |
| 145 | 671             | Ectodomain        | 683             | Ectodomain        | 0.36           |           |
| 146 | 152             | V1                | 153             | V1                | 0.36           | 1         |
| 147 | 236             | C2                | 275             | C2                | 0.36           | 1         |
| 148 | 275             | C2                | 282             | C2                | 0.36           | 1         |
| 149 | 845             | Endodomain        | 851             | Endodomain        | 0.36           |           |
| 150 | 151             | V1                | 152             | V1                | 0.36           | 1         |
| 151 | 837             | Endodomain        | 841             | Endodomain        | 0.36           |           |
| 152 | 841             | Endodomain        | 842             | Endodomain        | 0.36           |           |
| 153 | 24              | SP                | 25              | SP                | 0.36           |           |
| 154 | 154             | V1                | 300             | V3                | 0.35           | 1         |
| 155 | 665             | Ectodomain        | 667             | Ectodomain        | 0.35           |           |
| 156 | 308             | V3                | 316             | V3                | 0.35           | 1         |
| 157 | 667             | Ectodomain        | 674             | Ectodomain        | 0.35           |           |
| 158 | 798             | Endodomain        | 801             | Endodomain        | 0.35           |           |
| 159 | 824             | Endodomain        | 825             | Endodomain        | 0.35           |           |
| 160 | 817             | Endodomain        | 821             | Endodomain        | 0.35           |           |
| 161 | 146             | V1                | 148             | V1                | 0.35           |           |
| 162 | 833             | Endodomain        | 837             | Endodomain        | 0.35           |           |
| 163 | 816             | Endodomain        | 818             | Endodomain        | 0.35           |           |
| 164 | 279             | C2                | 474             | C5                | 0.35           | 0         |
| 165 | 630             | Ectodomain        | 633             | Ectodomain        | 0.35           |           |
| 166 | 178             | V2                | 195             | V2                | 0.35           | 0         |
| 167 | 840             | Endodomain        | 845             | Endodomain        | 0.34           |           |
| 168 | 392             | V4                | 394             | V4                | 0.34           | 1         |
| 169 | 332             | C3                | 336             | C3                | 0.34           | 0         |
| 170 | 137             | V1                | 140             | V1                | 0.34           | 0         |
| 171 | 5               | SP                | 6               | SP                | 0.34           |           |
| 172 | 319             | V3                | 322             | V3                | 0.34           | 1         |
| 173 | 346             | C3                | 393             | V4                | 0.34           | 1         |
| 174 | 354             | C3                | 356             | C3                | 0.34           | 1         |
| 175 | 135             | V1                | 138             | V1                | 0.34           | 1         |
| 176 | 140             | V1                | 141             | V1                | 0.34           |           |
| 177 | 147             | V1                | 148             | V1                | 0.34           |           |
| 178 | 144             | V1                | 145             | V1                | 0.34           |           |
| 179 | 150             | V1                | 154             | V1                | 0.34           | 0         |
| 180 | 632             | Ectodomain        | 640             | Ectodomain        | 0.34           |           |
| 181 | 146             | V1                | 147             | V1                | 0.34           |           |
| 182 | 394             | V4                | 395             | V4                | 0.33           | 1         |
| 183 | 309             | V3                | 315             | V3                | 0.33           | 1         |
| 184 | 500             | C5                | 619             | Ectodomain        | 0.33           |           |

Continued on next page

Table S1 – continued from previous page

|     | i (HXB2) | i (Domain) | j (HXB2) | j (Domain) | GREMLIN | TP |
|-----|----------|------------|----------|------------|---------|----|
| 185 | 178      | V2         | 194      | V2         | 0.33    | 1  |
| 186 | 363      | C3         | 364      | C3         | 0.33    | 1  |
| 187 | 514      | FP         | 515      | FP         | 0.33    |    |
| 188 | 152      | V1         | 155      | V1         | 0.33    | 1  |
| 189 | 136      | V1         | 139      | V1         | 0.33    | 1  |
| 190 | 683      | Ectodomain | 684      | Ectodomain | 0.32    |    |
| 191 | 62       | C1         | 63       | C1         | 0.32    | 1  |
| 192 | 31       | SP         | 32       | SP         | 0.32    | 1  |
| 193 | 662      | Ectodomain | 665      | Ectodomain | 0.32    |    |
| 194 | 444      | C4         | 446      | C4         | 0.32    | 1  |
| 195 | 388      | V4         | 389      | V4         | 0.32    | 1  |
| 196 | 25       | SP         | 26       | SP         | 0.32    |    |
| 197 | 185      | V2         | 186      | V2         | 0.32    | 0  |
| 198 | 723      | Endodomain | 724      | Endodomain | 0.32    |    |
| 199 | 328      | V3         | 330      | V3         | 0.32    | 1  |
| 200 | 166      | V2         | 167      | V2         | 0.32    | 1  |
| 201 | 62       | C1         | 65       | C1         | 0.32    | 1  |
| 202 | 746      | Endodomain | 747      | Endodomain | 0.32    |    |
| 203 | 295      | C2         | 446      | C4         | 0.32    | 1  |
| 204 | 269      | C2         | 348      | C3         | 0.31    | 1  |
| 205 | 21       | SP         | 23       | SP         | 0.31    |    |
| 206 | 211      | C2         | 379      | C3         | 0.31    | 1  |
| 207 | 588      | Ectodomain | 646      | Ectodomain | 0.31    |    |
| 208 | 10       | SP         | 12       | SP         | 0.31    |    |
| 209 | 134      | V1         | 154      | V1         | 0.31    | 1  |
| 210 | 460      | C4         | 461      | V5         | 0.31    | 1  |
| 211 | 347      | C3         | 350      | C3         | 0.31    | 1  |
| 212 | 396      | V4         | 399      | V4         | 0.31    | 1  |
| 213 | 515      | FP         | 518      | FP         | 0.31    |    |
| 214 | 364      | C3         | 365      | C3         | 0.31    | 1  |
| 215 | 397      | V4         | 400      | V4         | 0.31    | 0  |
| 216 | 266      | C2         | 269      | C2         | 0.31    | 1  |
| 217 | 49       | C1         | 99       | C1         | 0.31    | 1  |
| 218 | 677      | Ectodomain | 683      | Ectodomain | 0.31    |    |
| 219 | 7        | SP         | 9        | SP         | 0.31    |    |
| 220 | 179      | V2         | 192      | V2         | 0.31    | 0  |
| 221 | 722      | Endodomain | 723      | Endodomain | 0.30    |    |
| 222 | 289      | C2         | 290      | C2         | 0.30    | 1  |
| 223 | 337      | C3         | 340      | C3         | 0.30    | 1  |
| 224 | 667      | Ectodomain | 668      | Ectodomain | 0.30    |    |
| 225 | 410      | V4         | 413      | V4         | 0.30    | 1  |
| 226 | 429      | C4         | 432      | C4         | 0.30    | 1  |
| 227 | 424      | C4         | 425      | C4         | 0.30    | 1  |
| 228 | 463      | V5         | 465      | V5         | 0.30    | 1  |
| 229 | 346      | C3         | 395      | V4         | 0.30    | 1  |
| 230 | 301      | V3         | 303      | V3         | 0.30    | 1  |
| 231 | 172      | V2         | 305      | V3         | 0.30    | 1  |
| 232 | 754      | Endodomain | 756      | Endodomain | 0.30    |    |
| 233 | 535      | Ectodomain | 536      | Ectodomain | 0.30    |    |
| 234 | 665      | Ectodomain | 677      | Ectodomain | 0.30    |    |
| 235 | 291      | C2         | 293      | C2         | 0.30    | 1  |

Continued on next page

Table S1 – continued from previous page

|     | <b>i (HXB2)</b> | <b>i (Domain)</b> | <b>j (HXB2)</b> | <b>j (Domain)</b> | <b>GREMLIN</b> | <b>TP</b> |
|-----|-----------------|-------------------|-----------------|-------------------|----------------|-----------|
| 236 | 851             | Endodomain        | 854             | Endodomain        | 0.30           |           |
| 237 | 676             | Ectodomain        | 677             | Ectodomain        | 0.30           |           |
| 238 | 47              | C1                | 49              | C1                | 0.30           | 1         |
| 239 | 30              | SP                | 31              | SP                | 0.30           |           |
| 240 | 308             | V3                | 315             | V3                | 0.30           | 1         |
| 241 | 620             | Ectodomain        | 621             | Ectodomain        | 0.30           |           |
| 242 | 161             | V2                | 172             | V2                | 0.29           | 1         |
| 243 | 167             | V2                | 192             | V2                | 0.29           | 0         |
| 244 | 619             | Ectodomain        | 621             | Ectodomain        | 0.29           |           |
| 245 | 114             | C1                | 202             | C2                | 0.29           | 0         |
| 246 | 2               | SP                | 4               | SP                | 0.29           |           |
| 247 | 722             | Endodomain        | 724             | Endodomain        | 0.29           |           |
| 248 | 813             | Endodomain        | 817             | Endodomain        | 0.29           |           |
| 249 | 166             | V2                | 169             | V2                | 0.29           | 0         |
| 250 | 150             | V1                | 151             | V1                | 0.29           | 1         |
| 251 | 232             | C2                | 234             | C2                | 0.29           | 1         |
| 252 | 270             | C2                | 346             | C3                | 0.29           | 0         |
| 253 | 141             | V1                | 142             | V1                | 0.29           |           |
| 254 | 583             | Ectodomain        | 588             | Ectodomain        | 0.29           |           |
| 255 | 770             | Endodomain        | 773             | Endodomain        | 0.29           |           |
| 256 | 719             | Endodomain        | 721             | Endodomain        | 0.29           |           |
| 257 | 175             | V2                | 177             | V2                | 0.29           | 1         |
| 258 | 309             | V3                | 317             | V3                | 0.29           | 1         |
| 259 | 133             | V1                | 152             | V1                | 0.29           | 1         |
| 260 | 676             | Ectodomain        | 683             | Ectodomain        | 0.29           |           |
| 261 | 461             | V5                | 462             | V5                | 0.29           | 1         |
| 262 | 671             | Ectodomain        | 677             | Ectodomain        | 0.29           |           |
| 263 | 502             | C5                | 507             | C5                | 0.29           |           |
| 264 | 816             | Endodomain        | 824             | Endodomain        | 0.29           |           |
| 265 | 287             | C2                | 291             | C2                | 0.29           | 0         |
| 266 | 336             | C3                | 337             | C3                | 0.29           | 1         |
| 267 | 471             | V5                | 474             | C5                | 0.29           | 0         |
| 268 | 731             | Endodomain        | 732             | Endodomain        | 0.29           |           |
| 269 | 20              | SP                | 21              | SP                | 0.29           |           |
| 270 | 149             | V1                | 152             | V1                | 0.29           | 1         |
| 271 | 308             | V3                | 309             | V3                | 0.28           | 1         |
| 272 | 399             | V4                | 402             | V4                | 0.28           |           |
| 273 | 841             | Endodomain        | 856             | Endodomain        | 0.28           |           |
| 274 | 536             | Ectodomain        | 539             | Ectodomain        | 0.28           |           |
| 275 | 303             | V3                | 306             | V3                | 0.28           | 0         |
| 276 | 717             | Endodomain        | 721             | Endodomain        | 0.28           |           |
| 277 | 730             | Endodomain        | 732             | Endodomain        | 0.28           |           |
| 278 | 145             | V1                | 146             | V1                | 0.28           |           |
| 279 | 306             | V3                | 322             | V3                | 0.28           | 0         |
| 280 | 853             | Endodomain        | 856             | Endodomain        | 0.28           |           |
| 281 | 330             | V3                | 415             | V4                | 0.28           | 1         |
| 282 | 135             | V1                | 140             | V1                | 0.28           | 0         |
| 283 | 721             | Endodomain        | 723             | Endodomain        | 0.28           |           |
| 284 | 750             | Endodomain        | 758             | Endodomain        | 0.28           |           |
| 285 | 165             | V2                | 192             | V2                | 0.28           | 0         |
| 286 | 421             | C4                | 424             | C4                | 0.27           | 1         |

Continued on next page

Table S1 – continued from previous page

|     | <b>i (HXB2)</b> | <b>i (Domain)</b> | <b>j (HXB2)</b> | <b>j (Domain)</b> | <b>GREMLIN</b> | <b>TP</b> |
|-----|-----------------|-------------------|-----------------|-------------------|----------------|-----------|
| 287 | 281             | C2                | 283             | C2                | 0.27           | 1         |
| 288 | 395             | V4                | 396             | V4                | 0.27           | 1         |
| 289 | 731             | Endodomain        | 736             | Endodomain        | 0.27           |           |
| 290 | 335             | C3                | 339             | C3                | 0.27           | 1         |
| 291 | 19              | SP                | 29              | SP                | 0.27           |           |
| 292 | 146             | V1                | 154             | V1                | 0.27           |           |
| 293 | 31              | SP                | 33              | C1                | 0.27           | 1         |
| 294 | 10              | SP                | 21              | SP                | 0.27           |           |
| 295 | 640             | Ectodomain        | 644             | Ectodomain        | 0.27           |           |
| 296 | 832             | Endodomain        | 833             | Endodomain        | 0.27           |           |
| 297 | 133             | V1                | 155             | V1                | 0.27           | 1         |
| 298 | 293             | C2                | 297             | V3                | 0.27           | 0         |
| 299 | 750             | Endodomain        | 754             | Endodomain        | 0.27           |           |
| 300 | 719             | Endodomain        | 720             | Endodomain        | 0.27           |           |
| 301 | 12              | SP                | 21              | SP                | 0.27           |           |
| 302 | 85              | C1                | 230             | C2                | 0.27           | 0         |
| 303 | 770             | Endodomain        | 774             | Endodomain        | 0.27           |           |
| 304 | 306             | V3                | 321             | V3                | 0.26           | 1         |
| 305 | 290             | C2                | 291             | C2                | 0.26           | 1         |
| 306 | 291             | C2                | 344             | C3                | 0.26           | 0         |
| 307 | 230             | C2                | 234             | C2                | 0.26           | 1         |
| 308 | 150             | V1                | 153             | V1                | 0.26           | 1         |
| 309 | 161             | V2                | 192             | V2                | 0.26           | 0         |
| 310 | 10              | SP                | 20              | SP                | 0.26           |           |
| 311 | 289             | C2                | 293             | C2                | 0.26           | 0         |
| 312 | 232             | C2                | 236             | C2                | 0.26           | 0         |
| 313 | 343             | C3                | 346             | C3                | 0.26           | 1         |
| 314 | 340             | C3                | 343             | C3                | 0.26           | 1         |
| 315 | 137             | V1                | 142             | V1                | 0.26           |           |
| 316 | 837             | Endodomain        | 840             | Endodomain        | 0.26           |           |
| 317 | 84              | C1                | 578             | Ectodomain        | 0.26           |           |
| 318 | 722             | Endodomain        | 726             | Endodomain        | 0.26           |           |
| 319 | 343             | C3                | 347             | C3                | 0.26           | 1         |
| 320 | 825             | Endodomain        | 829             | Endodomain        | 0.26           |           |
| 321 | 19              | SP                | 20              | SP                | 0.26           |           |
| 322 | 618             | Ectodomain        | 621             | Ectodomain        | 0.26           |           |
| 323 | 619             | Ectodomain        | 624             | Ectodomain        | 0.26           |           |
| 324 | 668             | Ectodomain        | 677             | Ectodomain        | 0.26           |           |
| 325 | 134             | V1                | 137             | V1                | 0.26           | 1         |
| 326 | 169             | V2                | 170             | V2                | 0.26           | 1         |
| 327 | 350             | C3                | 351             | C3                | 0.26           | 1         |
| 328 | 667             | Ectodomain        | 671             | Ectodomain        | 0.26           |           |
| 329 | 8               | SP                | 9               | SP                | 0.26           |           |
| 330 | 167             | V2                | 426             | C4                | 0.26           | 0         |
| 331 | 335             | C3                | 336             | C3                | 0.26           | 1         |
| 332 | 65              | C1                | 68              | C1                | 0.26           | 1         |
| 333 | 146             | V1                | 150             | V1                | 0.25           |           |
| 334 | 393             | V4                | 394             | V4                | 0.25           | 1         |
| 335 | 172             | V2                | 173             | V2                | 0.25           | 1         |
| 336 | 565             | Ectodomain        | 646             | Ectodomain        | 0.25           |           |
| 337 | 369             | C3                | 373             | C3                | 0.25           | 1         |

Continued on next page

Table S1 – continued from previous page

|     | <b>i (HXB2)</b> | <b>i (Domain)</b> | <b>j (HXB2)</b> | <b>j (Domain)</b> | <b>GREMLIN</b> | <b>TP</b> |
|-----|-----------------|-------------------|-----------------|-------------------|----------------|-----------|
| 338 | 178             | V2                | 183             | V2                | 0.25           | 0         |
| 339 | 151             | V1                | 153             | V1                | 0.25           | 1         |
| 340 | 770             | Endodomain        | 783             | Endodomain        | 0.25           |           |
| 341 | 335             | C3                | 337             | C3                | 0.25           | 1         |
| 342 | 651             | Ectodomain        | 658             | Ectodomain        | 0.25           |           |
| 343 | 146             | V1                | 149             | V1                | 0.25           |           |
| 344 | 10              | SP                | 23              | SP                | 0.25           |           |
| 345 | 236             | C2                | 238             | C2                | 0.25           | 1         |
| 346 | 232             | C2                | 269             | C2                | 0.25           | 1         |
| 347 | 346             | C3                | 350             | C3                | 0.25           | 1         |
| 348 | 287             | C2                | 289             | C2                | 0.25           | 1         |
| 349 | 65              | C1                | 379             | C3                | 0.25           | 0         |
| 350 | 347             | C3                | 351             | C3                | 0.25           | 1         |
| 351 | 788             | Endodomain        | 792             | Endodomain        | 0.25           |           |
| 352 | 316             | V3                | 319             | V3                | 0.25           | 1         |
| 353 | 151             | V1                | 154             | V1                | 0.25           | 1         |
| 354 | 194             | V2                | 195             | V2                | 0.25           | 1         |
| 355 | 148             | V1                | 149             | V1                | 0.25           |           |
| 356 | 232             | C2                | 240             | C2                | 0.25           | 0         |
| 357 | 426             | C4                | 429             | C4                | 0.25           | 1         |
| 358 | 159             | V2                | 174             | V2                | 0.25           | 1         |
| 359 | 302             | V3                | 306             | V3                | 0.25           | 0         |
| 360 | 845             | Endodomain        | 854             | Endodomain        | 0.25           |           |
| 361 | 825             | Endodomain        | 833             | Endodomain        | 0.25           |           |
| 362 | 336             | C3                | 340             | C3                | 0.25           | 1         |
| 363 | 836             | Endodomain        | 839             | Endodomain        | 0.25           |           |
| 364 | 307             | V3                | 316             | V3                | 0.25           | 1         |
| 365 | 275             | C2                | 474             | C5                | 0.25           | 0         |
| 366 | 619             | Ectodomain        | 620             | Ectodomain        | 0.25           |           |
| 367 | 154             | V1                | 155             | V1                | 0.25           | 1         |
| 368 | 371             | C3                | 375             | C3                | 0.25           | 1         |
| 369 | 0               |                   | 21              | SP                | 0.25           |           |
| 370 | 87              | C1                | 240             | C2                | 0.25           | 0         |
| 371 | 277             | C2                | 278             | C2                | 0.25           | 1         |
| 372 | 164             | V2                | 165             | V2                | 0.25           | 1         |
| 373 | 801             | Endodomain        | 825             | Endodomain        | 0.25           |           |
| 374 | 9               | SP                | 20              | SP                | 0.25           |           |
| 375 | 304             | V3                | 322             | V3                | 0.24           | 1         |
| 376 | 121             | C1                | 429             | C4                | 0.24           | 1         |
| 377 | 28              | SP                | 31              | SP                | 0.24           |           |
| 378 | 617             | Ectodomain        | 626             | Ectodomain        | 0.24           |           |
| 379 | 21              | SP                | 22              | SP                | 0.24           |           |
| 380 | 830             | Endodomain        | 833             | Endodomain        | 0.24           |           |
| 381 | 325             | V3                | 328             | V3                | 0.24           | 1         |
| 382 | 797             | Endodomain        | 800             | Endodomain        | 0.24           |           |
| 383 | 754             | Endodomain        | 758             | Endodomain        | 0.24           |           |
| 384 | 275             | C2                | 281             | C2                | 0.24           | 0         |
| 385 | 149             | V1                | 154             | V1                | 0.24           | 0         |
| 386 | 425             | C4                | 432             | C4                | 0.24           | 1         |
| 387 | 158             | V2                | 173             | V2                | 0.24           | 1         |
| 388 | 12              | SP                | 23              | SP                | 0.24           |           |

Continued on next page



**Table S1 – continued from previous page**

|     | <b>i (HXB2)</b> | <b>i (Domain)</b> | <b>j (HXB2)</b> | <b>j (Domain)</b> | <b>GREMLIN</b> | <b>TP</b> |
|-----|-----------------|-------------------|-----------------|-------------------|----------------|-----------|
| 389 | 373             | C3                | 375             | C3                | 0.24           | 1         |
| 390 | 393             | V4                | 396             | V4                | 0.24           | 1         |
| 391 | 303             | V3                | 323             | V3                | 0.24           | 1         |
| 392 | 700             | TM                | 706             | Endodomain        | 0.24           |           |
| 393 | 749             | Endodomain        | 758             | Endodomain        | 0.24           |           |
| 394 | 460             | C4                | 463             | V5                | 0.24           | 1         |
| 395 | 12              | SP                | 20              | SP                | 0.24           |           |
| 396 | 829             | Endodomain        | 836             | Endodomain        | 0.24           |           |
| 397 | 173             | V2                | 305             | V3                | 0.24           | 1         |
| 398 | 805             | Endodomain        | 809             | Endodomain        | 0.24           |           |
| 399 | 283             | C2                | 471             | V5                | 0.24           | 1         |
| 400 | 183             | V2                | 184             | V2                | 0.24           | 1         |
| 401 | 747             | Endodomain        | 755             | Endodomain        | 0.24           |           |
| 402 | 287             | C2                | 481             | C5                | 0.24           | 1         |
| 403 | 306             | V3                | 323             | V3                | 0.24           | 0         |
| 404 | 301             | V3                | 302             | V3                | 0.24           | 1         |
| 405 | 172             | V2                | 198             | C2                | 0.24           | 0         |
| 406 | 340             | C3                | 344             | C3                | 0.24           | 1         |
| 407 | 535             | Ectodomain        | 539             | Ectodomain        | 0.24           |           |
| 408 | 4               | SP                | 0               |                   | 0.24           |           |
| 409 | 515             | FP                | 519             | FP                | 0.24           |           |
| 410 | 674             | Ectodomain        | 676             | Ectodomain        | 0.24           |           |
| 411 | 28              | SP                | 30              | SP                | 0.24           |           |
| 412 | 306             | V3                | 316             | V3                | 0.24           | 1         |
| 413 | 234             | C2                | 275             | C2                | 0.24           | 0         |
| 414 | 303             | V3                | 440             | C4                | 0.24           | 1         |
| 415 | 302             | V3                | 303             | V3                | 0.23           | 1         |
| 416 | 238             | C2                | 630             | Ectodomain        | 0.23           |           |
| 417 | 287             | C2                | 290             | C2                | 0.23           | 0         |
| 418 | 335             | C3                | 389             | V4                | 0.23           | 1         |
| 419 | 270             | C2                | 277             | C2                | 0.23           | 0         |
| 420 | 202             | C2                | 432             | C4                | 0.23           | 1         |
| 421 | 781             | Endodomain        | 796             | Endodomain        | 0.23           |           |
| 422 | 9               | SP                | 10              | SP                | 0.23           |           |
| 423 | 648             | Ectodomain        | 655             | Ectodomain        | 0.23           |           |
| 424 | 12              | SP                | 30              | SP                | 0.23           |           |
