# Supplementary material for: Coevolution Analysis of HIV-1 Envelope Glycoprotein Complex
Source: PubMed Central journal article supplement (PMC4651434; doi:10.1371/journal.pone.0143245), 2015-11-18
Supplement: pone.0143245.s003.pdf [file pone.0143245.s003.pdf]

Supplementary information for:  
Coevolution Analysis of HIV-1 Envelope Glycoprotein Complex

Reda Rawi<sup>1,\*</sup>, Khalid Kunji<sup>1</sup>, Abdelali Haoudi<sup>2,3</sup>, Halima Bensmail<sup>1</sup>

**1 Computational Sciences and Engineering Center, Qatar Computing Research  
Institute, Doha, Qatar**

**2 Division of Genetics and Genomics, Boston Children's Hospital, Harvard  
Medical School, Boston, MA, USA**

**3 King Abdullah International Medical Research Center, King Abdulaziz  
Medical City, Riyadh, Saudi Arabia**

**\* Corresponding author  
E-mail: rrawi@qf.org.qa (RR)**

**Table S2: Coevolving residues within V3.**

|     | <b>i (HXB2)</b> | <b>j (HXB2)</b> | <b>GREMLIN</b> | <b>TP</b> |
|-----|-----------------|-----------------|----------------|-----------|
| 47  | 321             | 322             | 0.55           | 1         |
| 62  | 306             | 308             | 0.51           | 1         |
| 127 | 320             | 321             | 0.38           | 1         |
| 156 | 308             | 316             | 0.35           | 1         |
| 172 | 319             | 322             | 0.34           | 1         |
| 183 | 309             | 315             | 0.33           | 1         |
| 199 | 328             | 330             | 0.32           | 1         |
| 230 | 301             | 303             | 0.30           | 1         |
| 240 | 308             | 315             | 0.30           | 1         |
| 258 | 309             | 317             | 0.29           | 1         |
| 271 | 308             | 309             | 0.28           | 1         |
| 275 | 303             | 306             | 0.28           | 0         |
| 279 | 306             | 322             | 0.28           | 0         |
| 304 | 306             | 321             | 0.26           | 1         |
| 352 | 316             | 319             | 0.25           | 1         |
| 359 | 302             | 306             | 0.25           | 0         |
| 364 | 307             | 316             | 0.25           | 1         |
| 375 | 304             | 322             | 0.24           | 1         |
| 381 | 325             | 328             | 0.24           | 1         |
| 391 | 303             | 323             | 0.24           | 1         |
| 403 | 306             | 323             | 0.24           | 0         |
| 404 | 301             | 302             | 0.24           | 1         |
| 412 | 306             | 316             | 0.24           | 1         |
| 415 | 302             | 303             | 0.23           | 1         |
