# Supplementary material for: Coevolution Analysis of HIV-1 Envelope Glycoprotein Complex
Source: PubMed Central journal article supplement (PMC4651434; doi:10.1371/journal.pone.0143245), 2015-11-18
Supplement: pone.0143245.s004.pdf [file pone.0143245.s004.pdf]

Supplementary information for:  
Coevolution Analysis of HIV-1 Envelope Glycoprotein Complex

Reda Rawi<sup>1,\*</sup>, Khalid Kunji<sup>1</sup>, Abdelali Haoudi<sup>2,3</sup>, Halima Bensmail<sup>1</sup>

**1 Computational Sciences and Engineering Center, Qatar Computing Research  
Institute, Doha, Qatar**

**2 Division of Genetics and Genomics, Boston Children's Hospital, Harvard  
Medical School, Boston, MA, USA**

**3 King Abdullah International Medical Research Center, King Abdulaziz  
Medical City, Riyadh, Saudi Arabia**

**\* Corresponding author**

**E-mail: rrawi@qf.org.qa (RR)**

**Table S3: Coevolving pairs between residues in V3 and other structural regions  
in 361 the HIV-1 Env.**

|     | <b>i (HXB2)</b> | <b>i (Domain)</b> | <b>j (HXB2)</b> | <b>j (Domain)</b> | <b>GREMLIN</b> | <b>TP</b> |
|-----|-----------------|-------------------|-----------------|-------------------|----------------|-----------|
| 15  | 295             | C2                | 297             | V3                | 0.78           | 1         |
| 79  | 325             | V3                | 419             | C4                | 0.45           | 1         |
| 90  | 330             | V3                | 334             | C3                | 0.43           | 0         |
| 107 | 330             | V3                | 332             | C3                | 0.41           | 1         |
| 129 | 300             | V3                | 442             | C4                | 0.38           | 1         |
| 154 | 154             | V1                | 300             | V3                | 0.35           | 1         |
| 231 | 172             | V2                | 305             | V3                | 0.30           | 1         |
| 281 | 330             | V3                | 415             | V4                | 0.28           | 1         |
| 298 | 293             | C2                | 297             | V3                | 0.27           | 0         |
| 397 | 173             | V2                | 305             | V3                | 0.24           | 1         |
| 414 | 303             | V3                | 440             | C4                | 0.24           | 1         |
